# Supplementary material
Source: Springer Nature journal article supplement (https://www.springermedizin.de/resource/supplementary/12913_2012_3744_MOESM4_ESM.pdf/9532290)

a

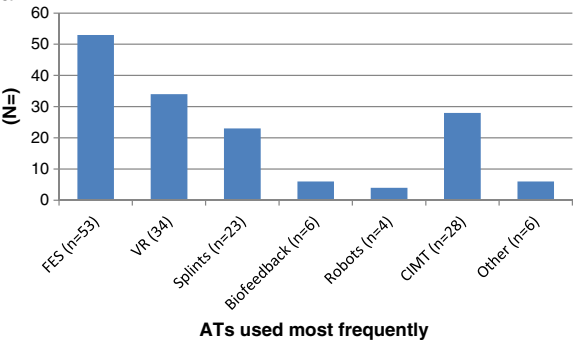

b

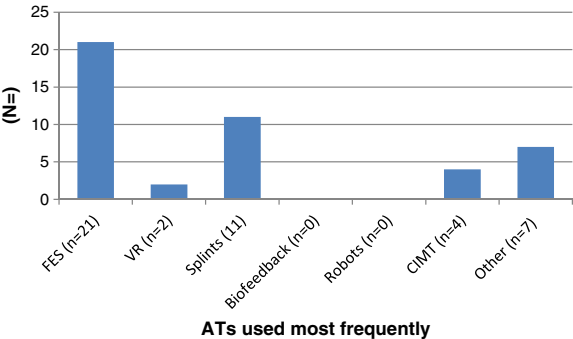

Supplement: MOESM4 [file 9532290]
